# Supplementary material
Source: PubMed Central journal article supplement (PMC6327841)

**A**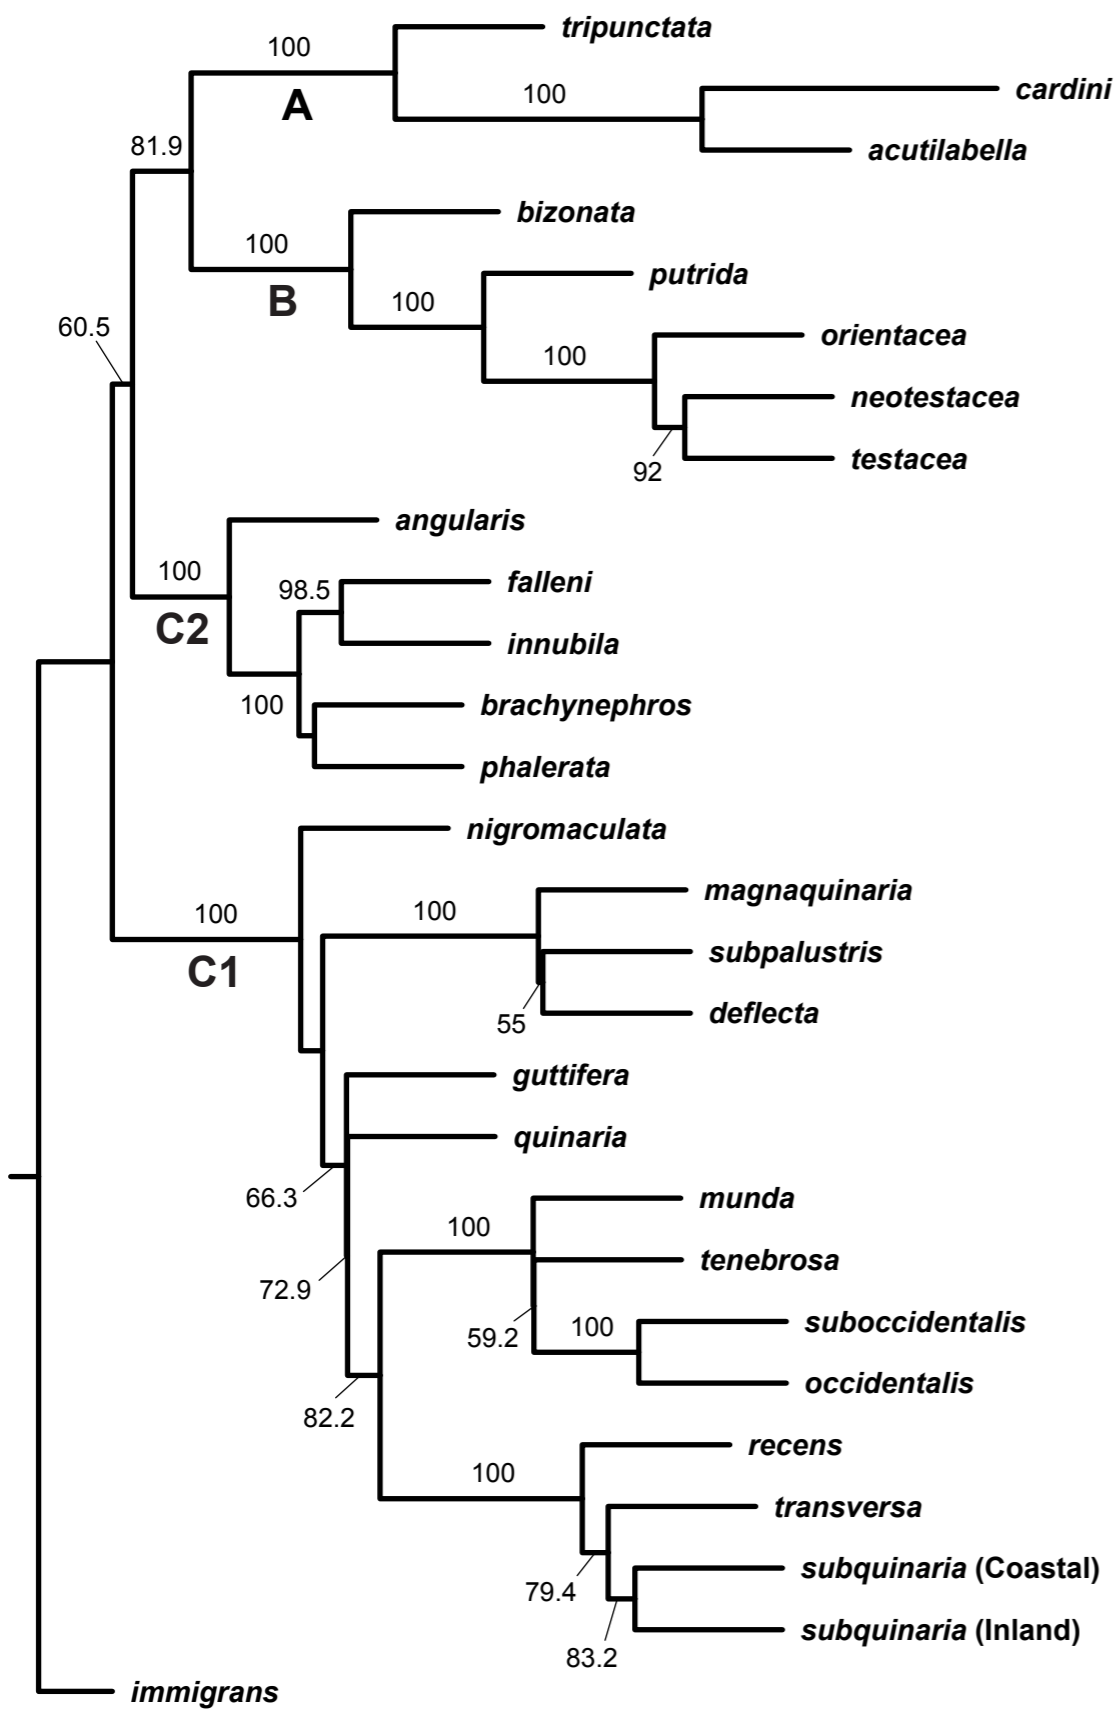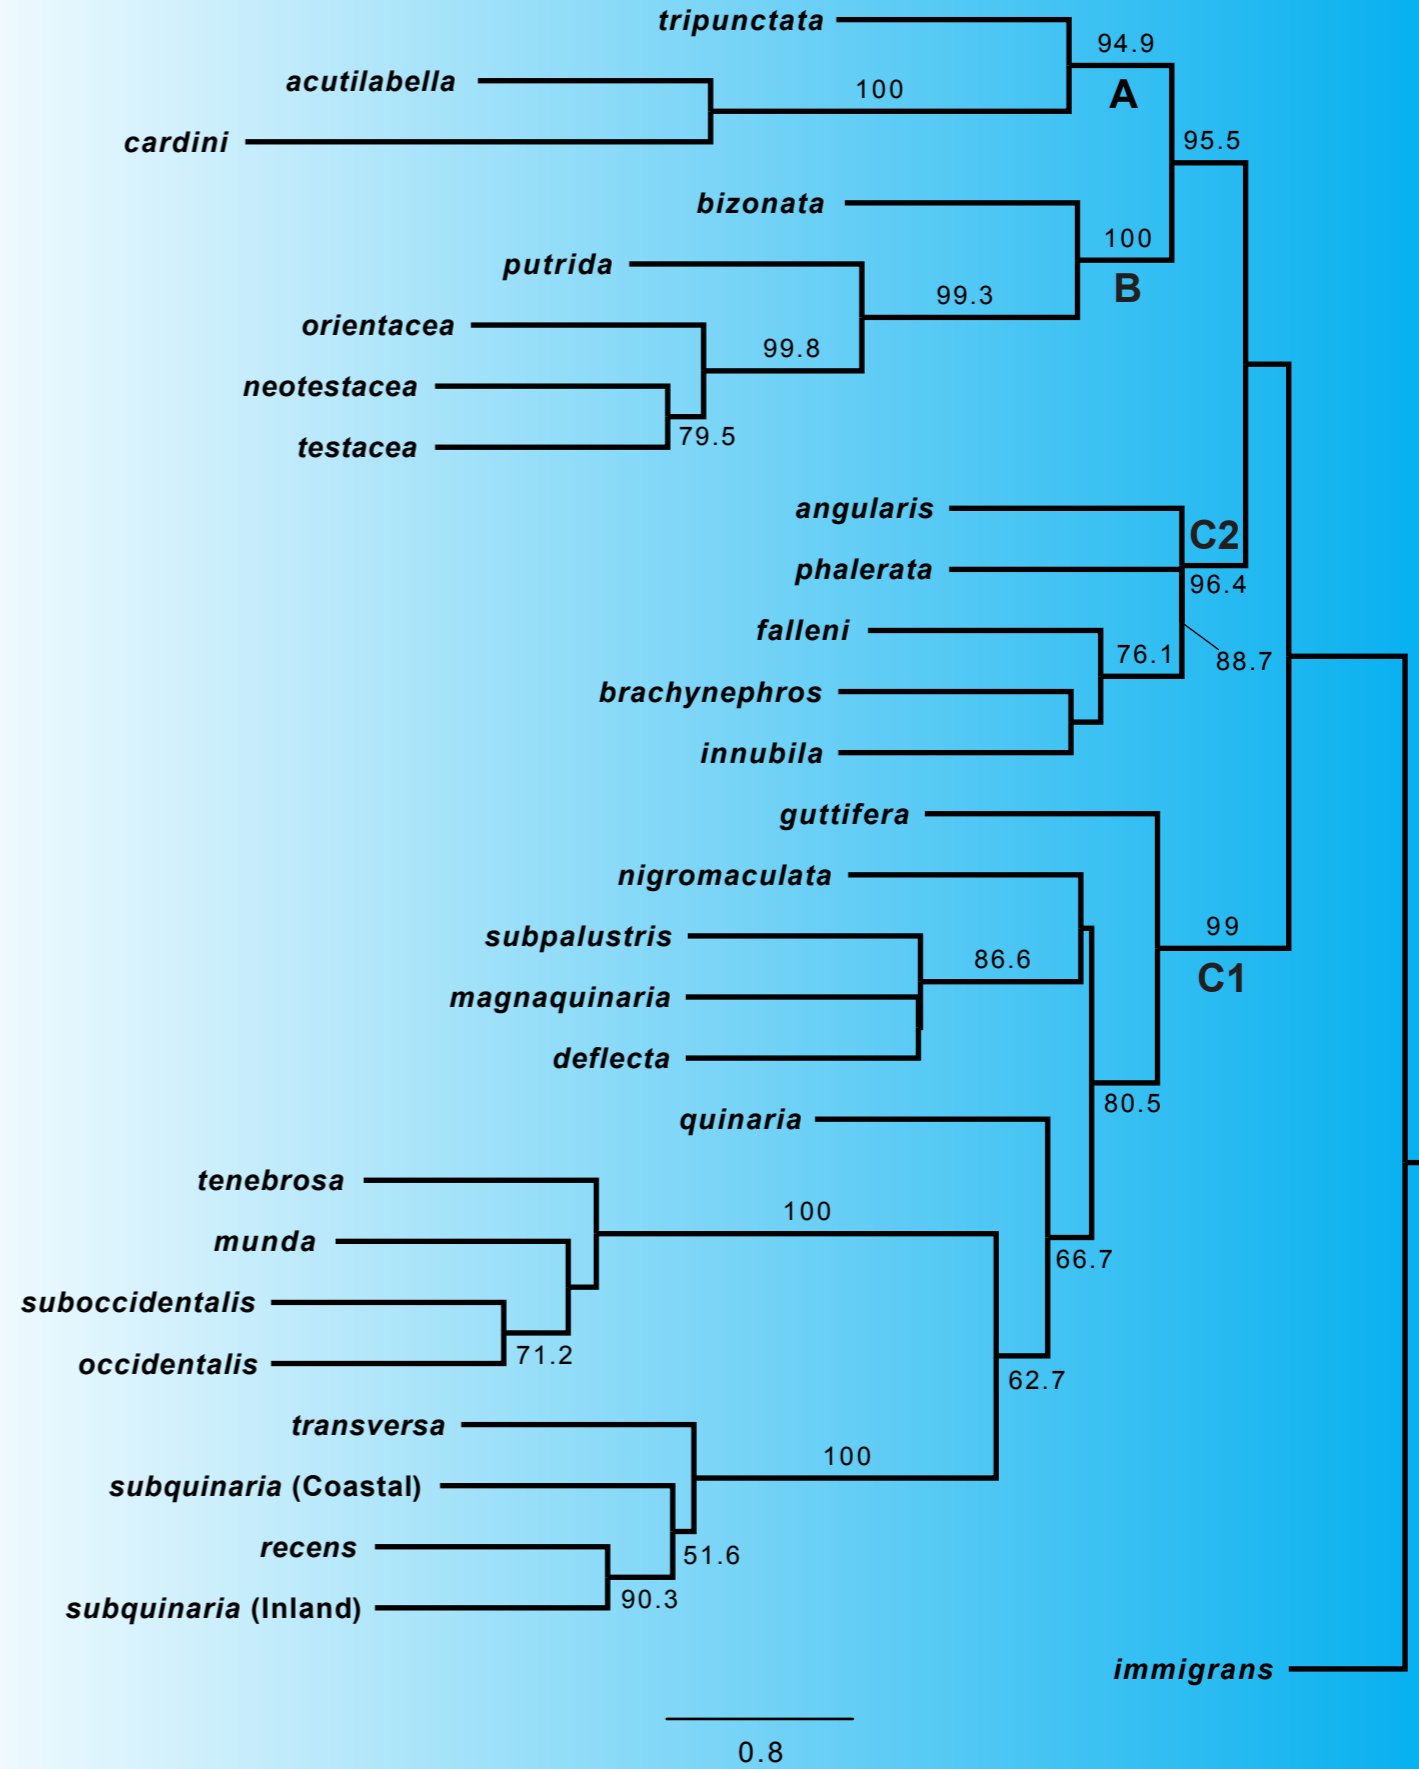

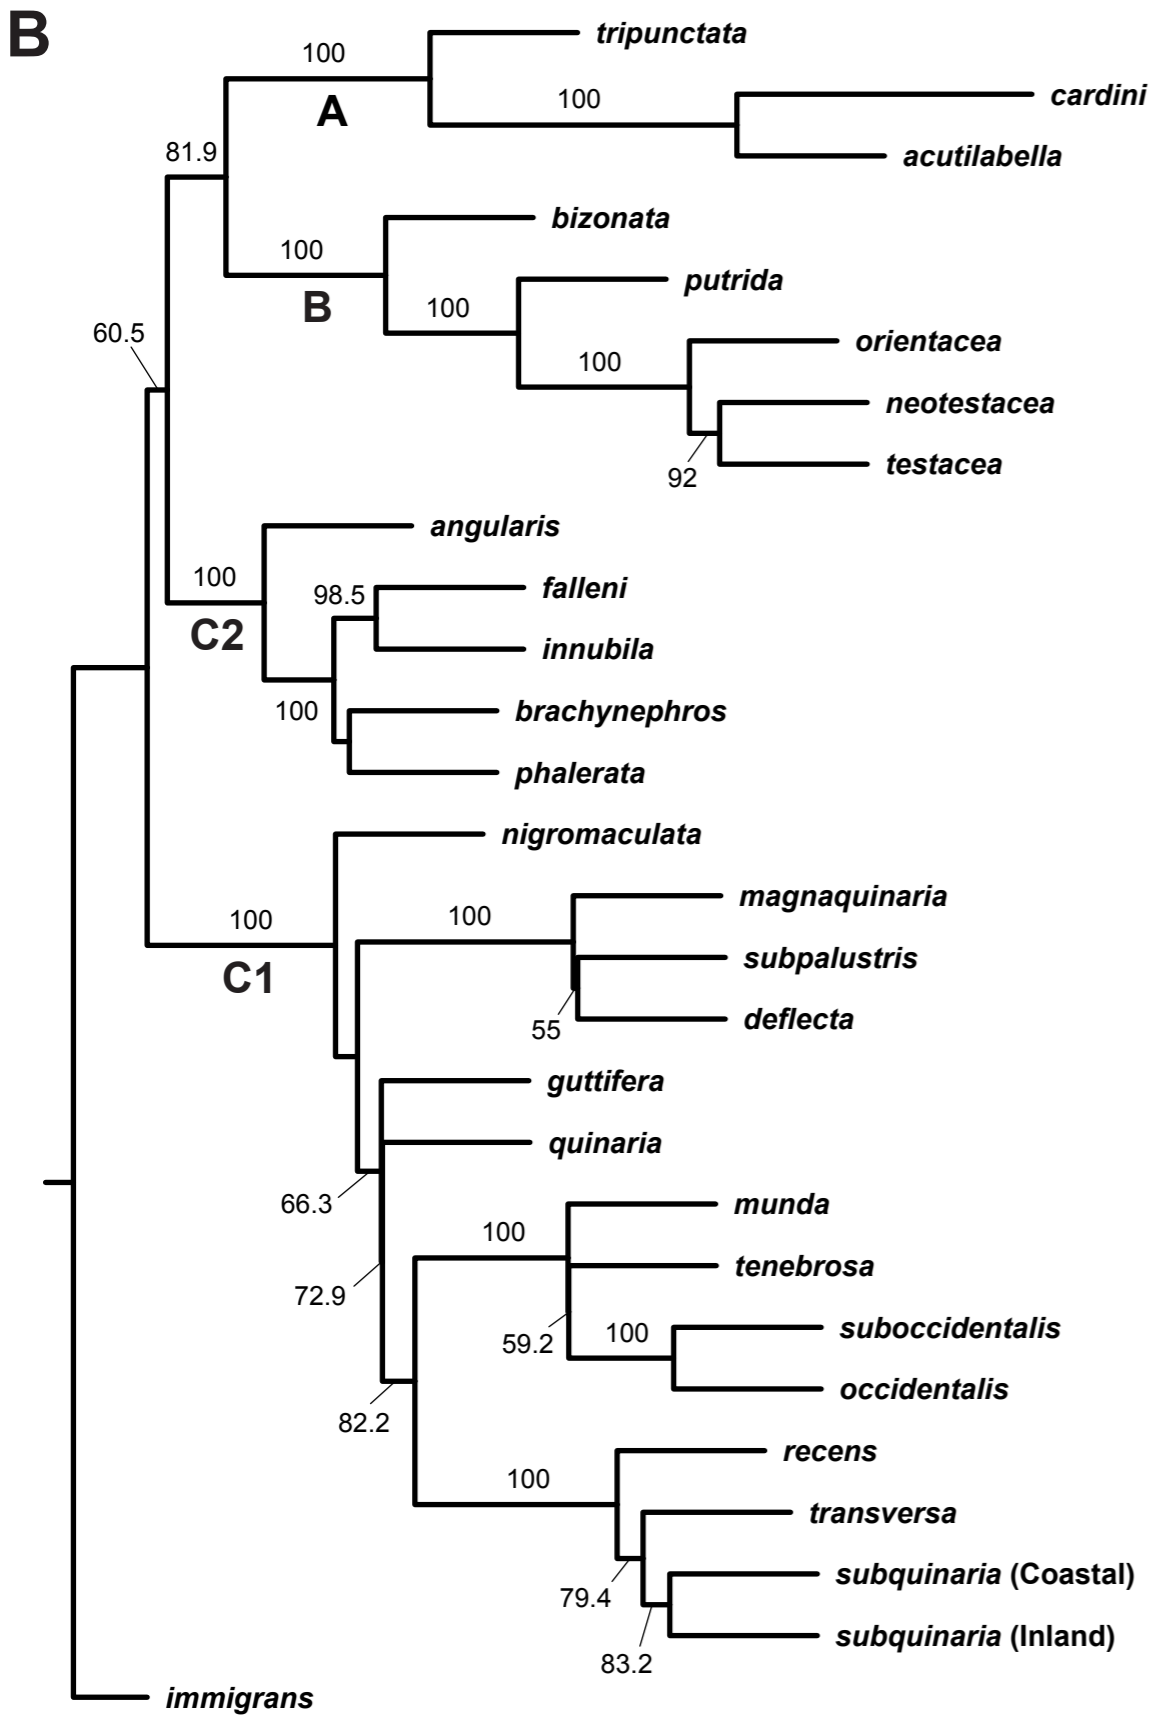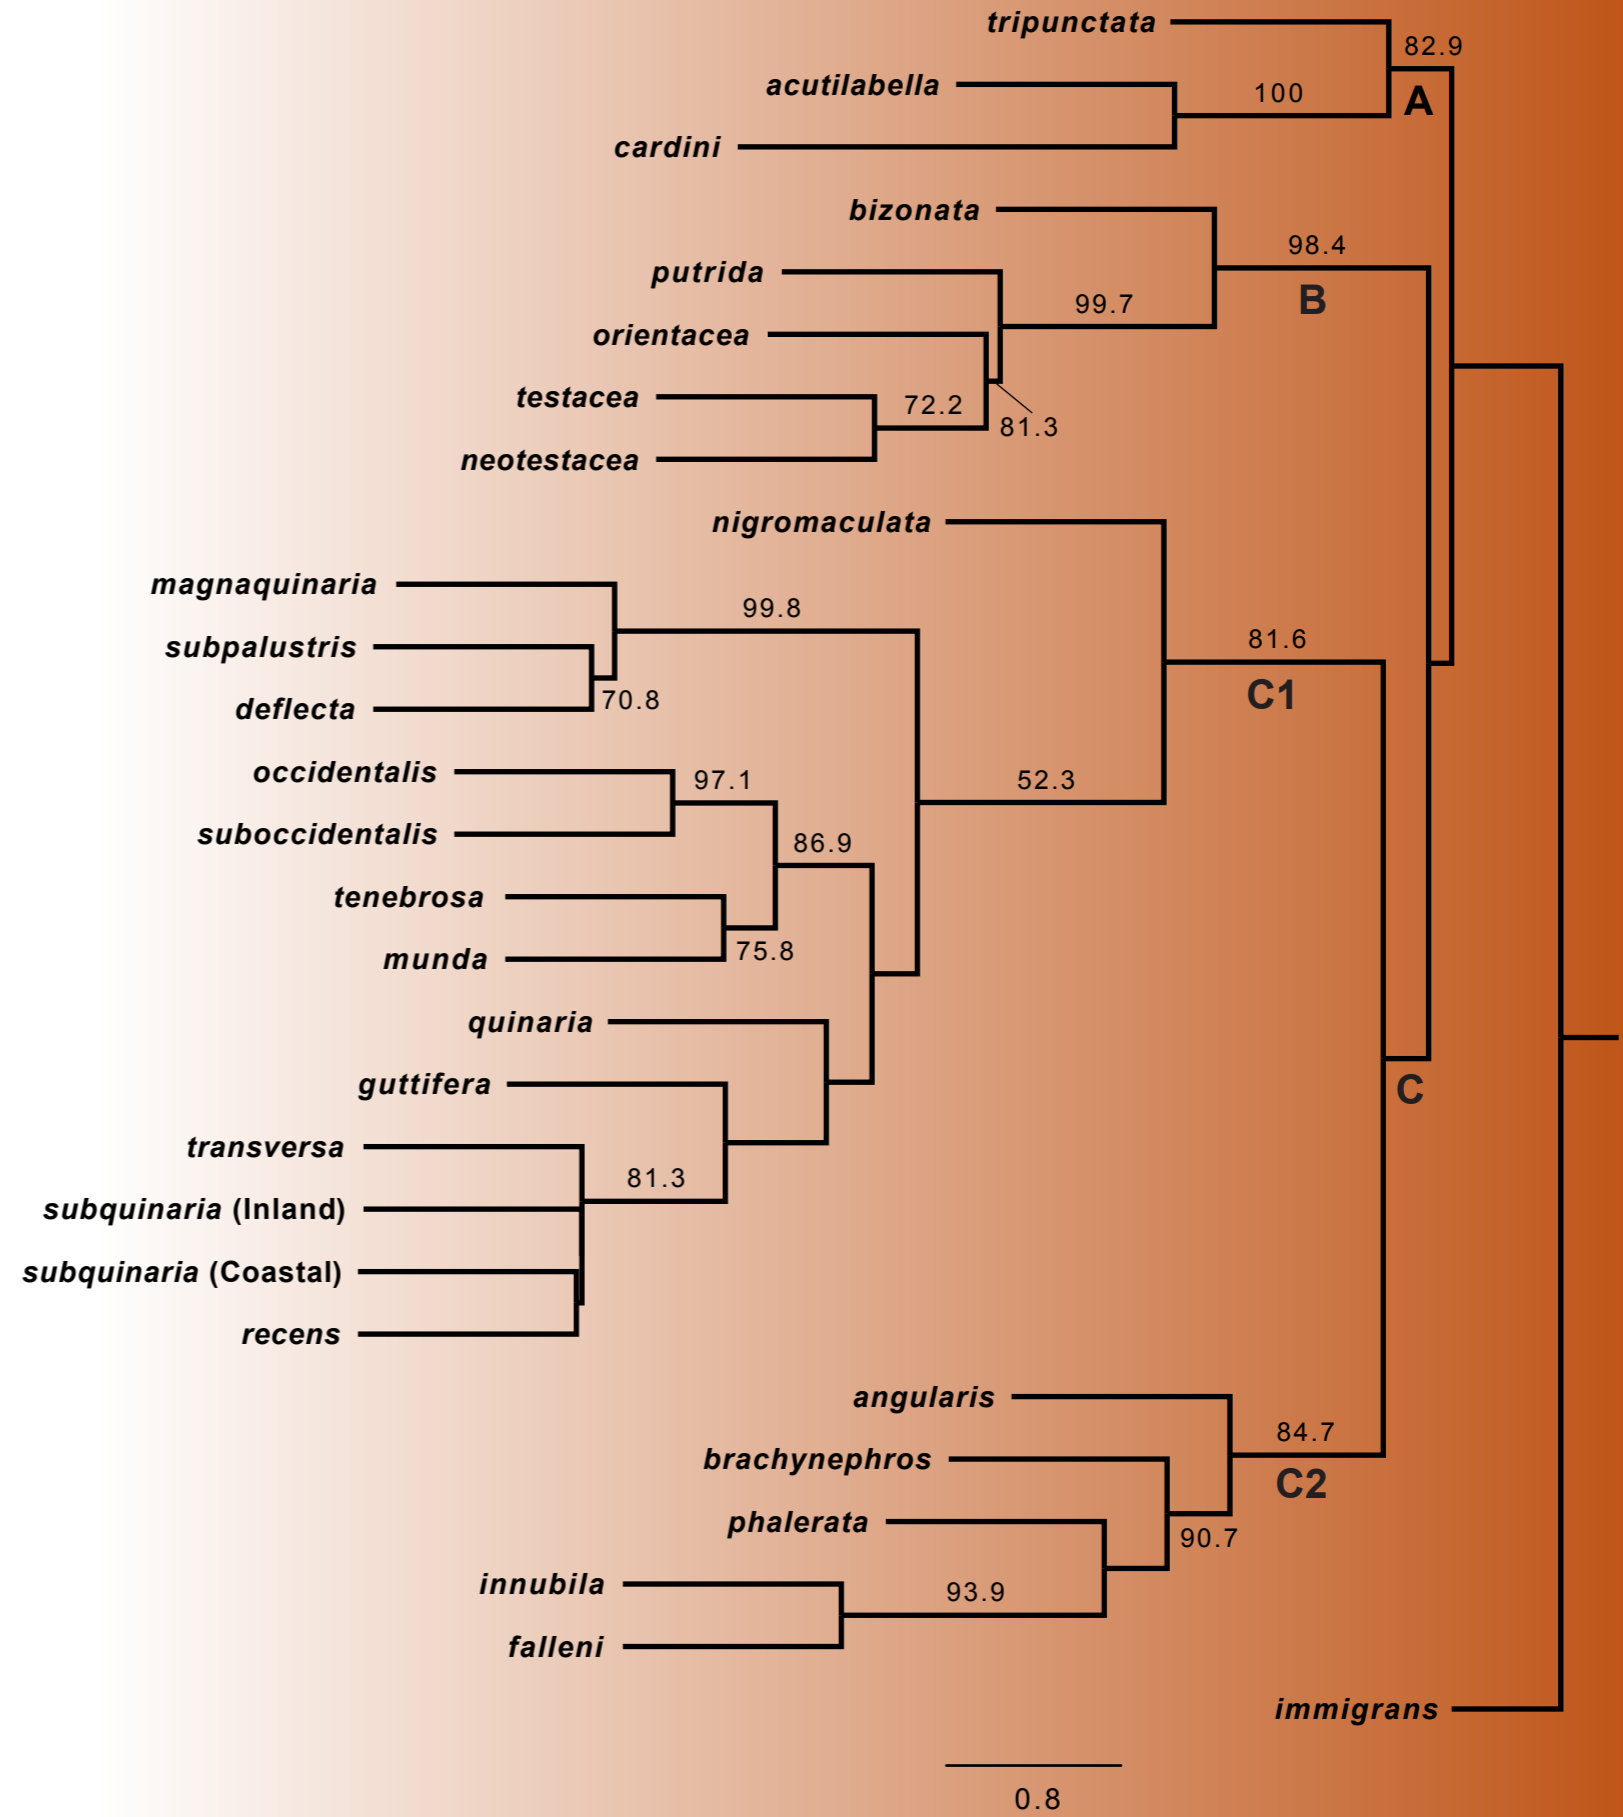

**C**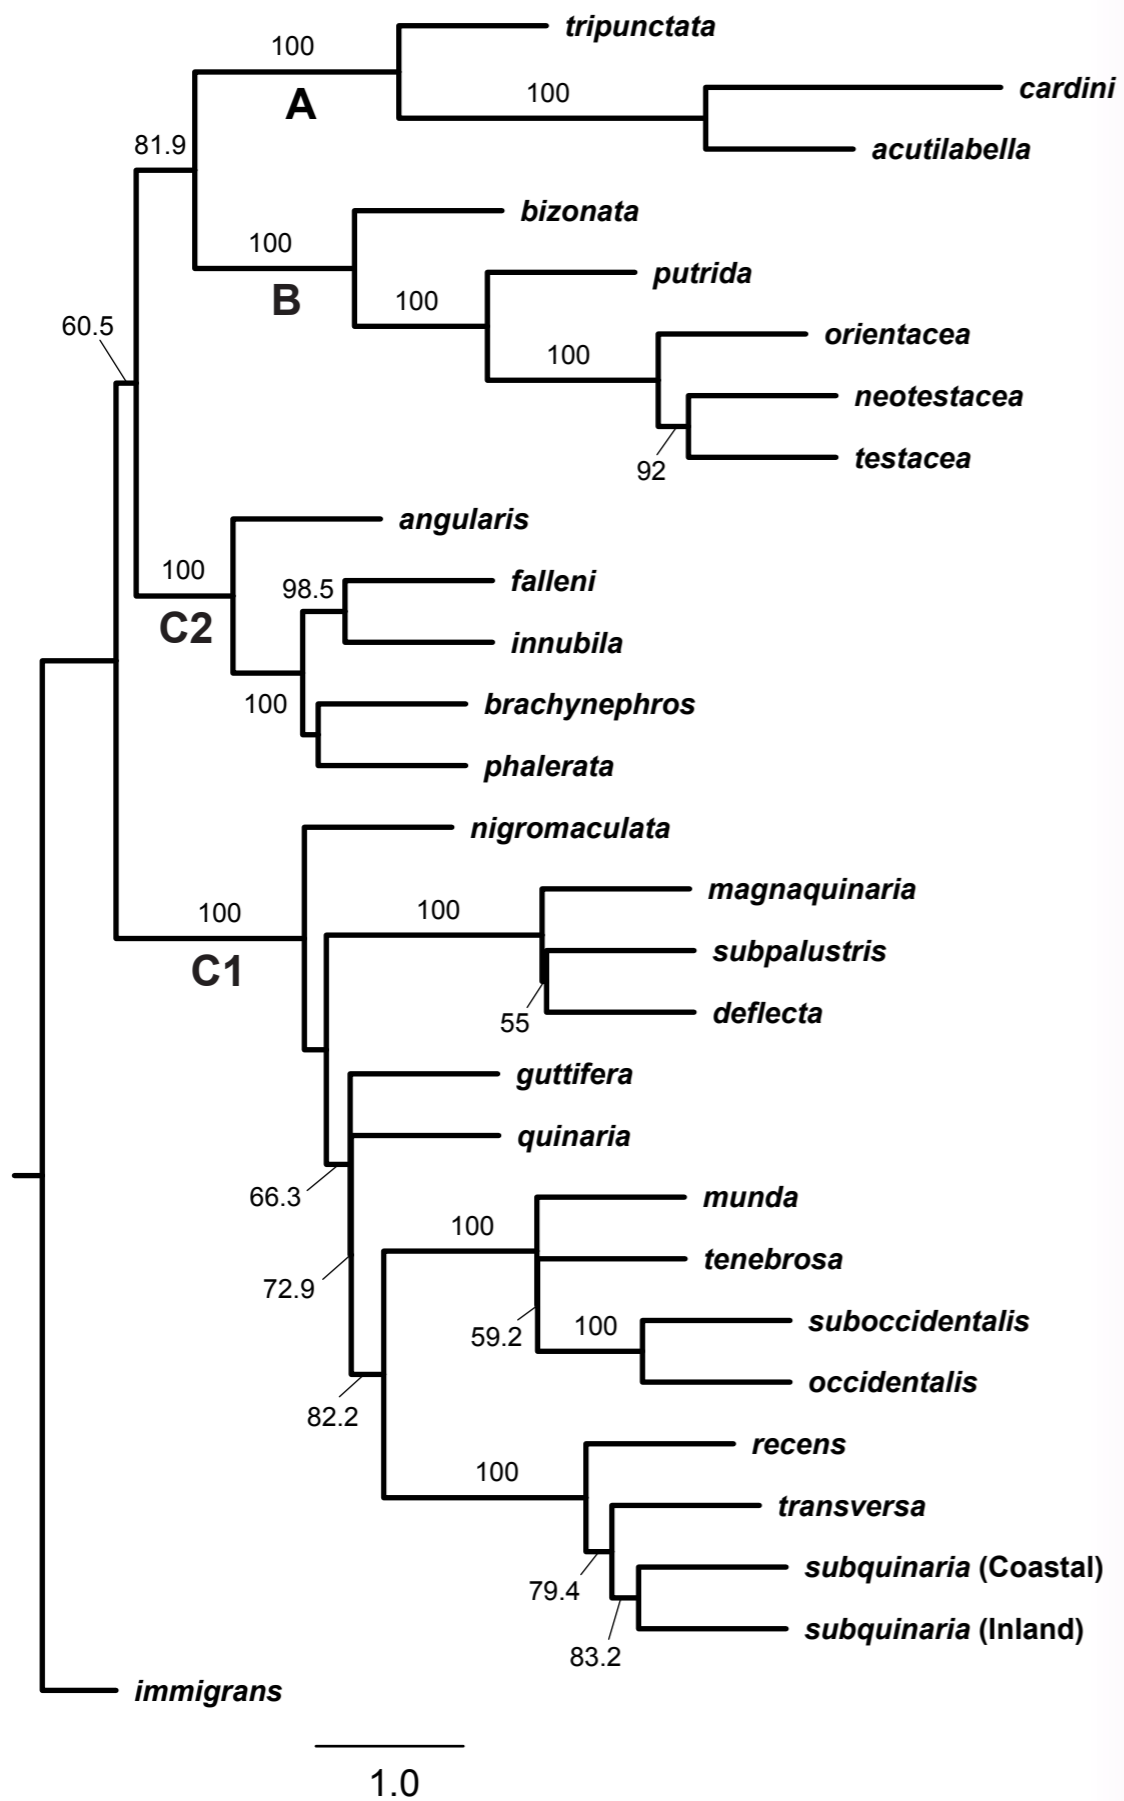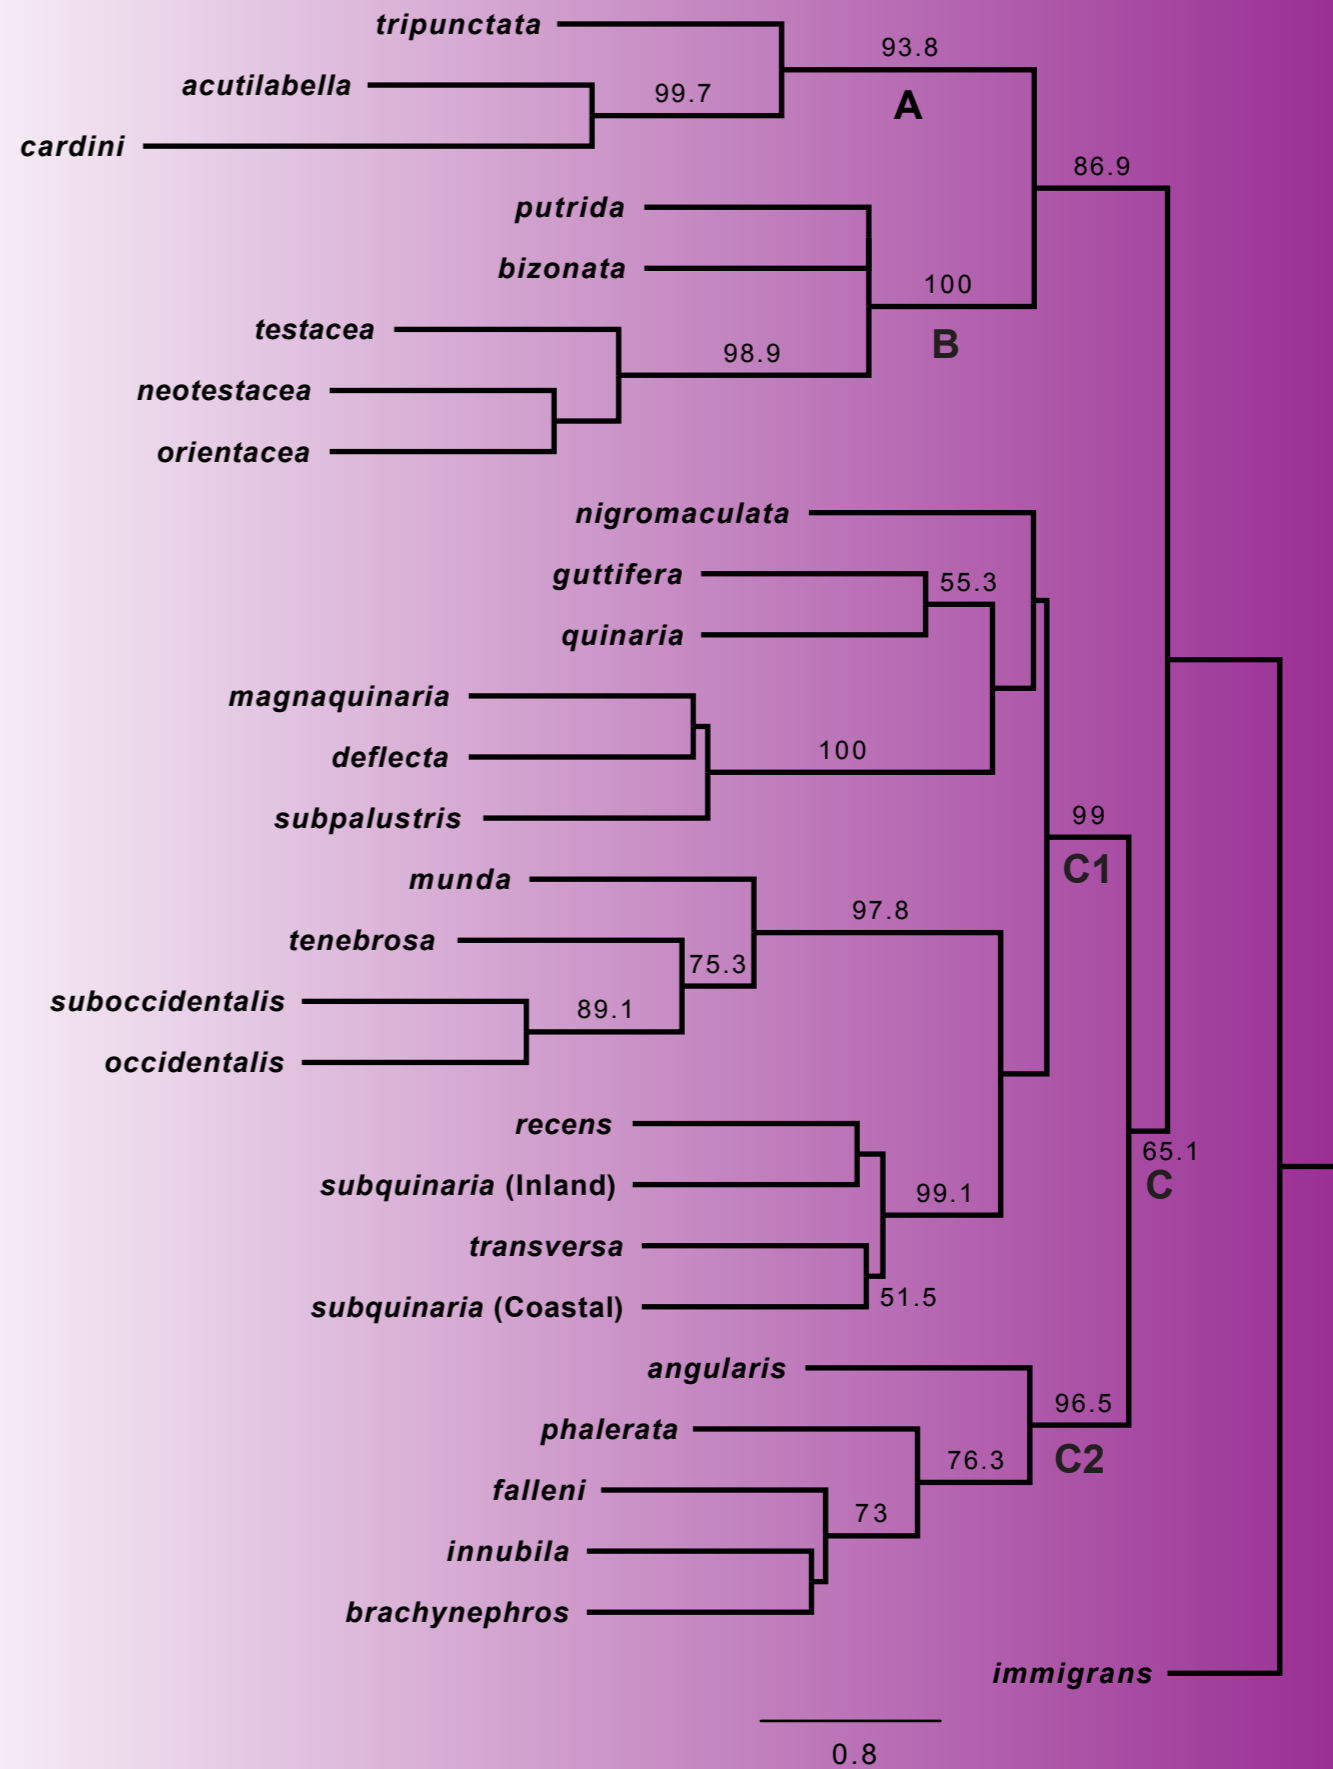

**D**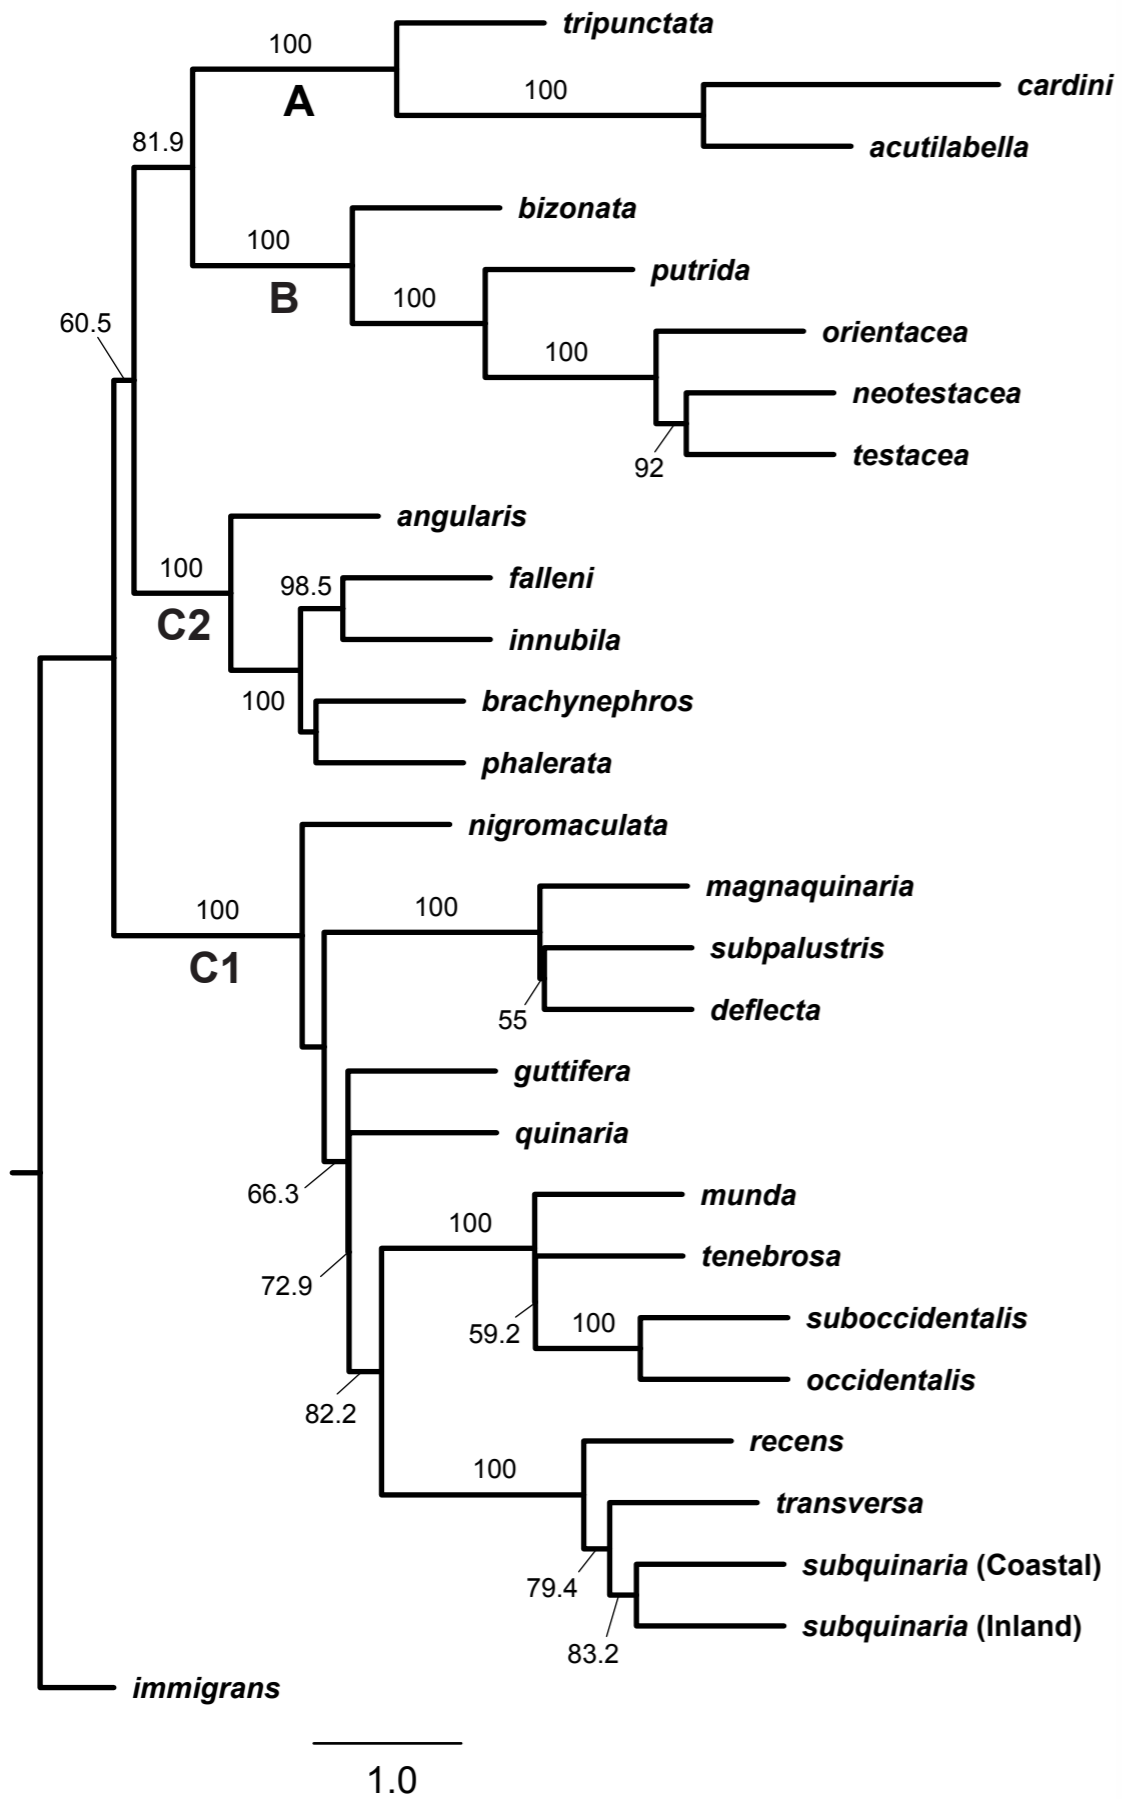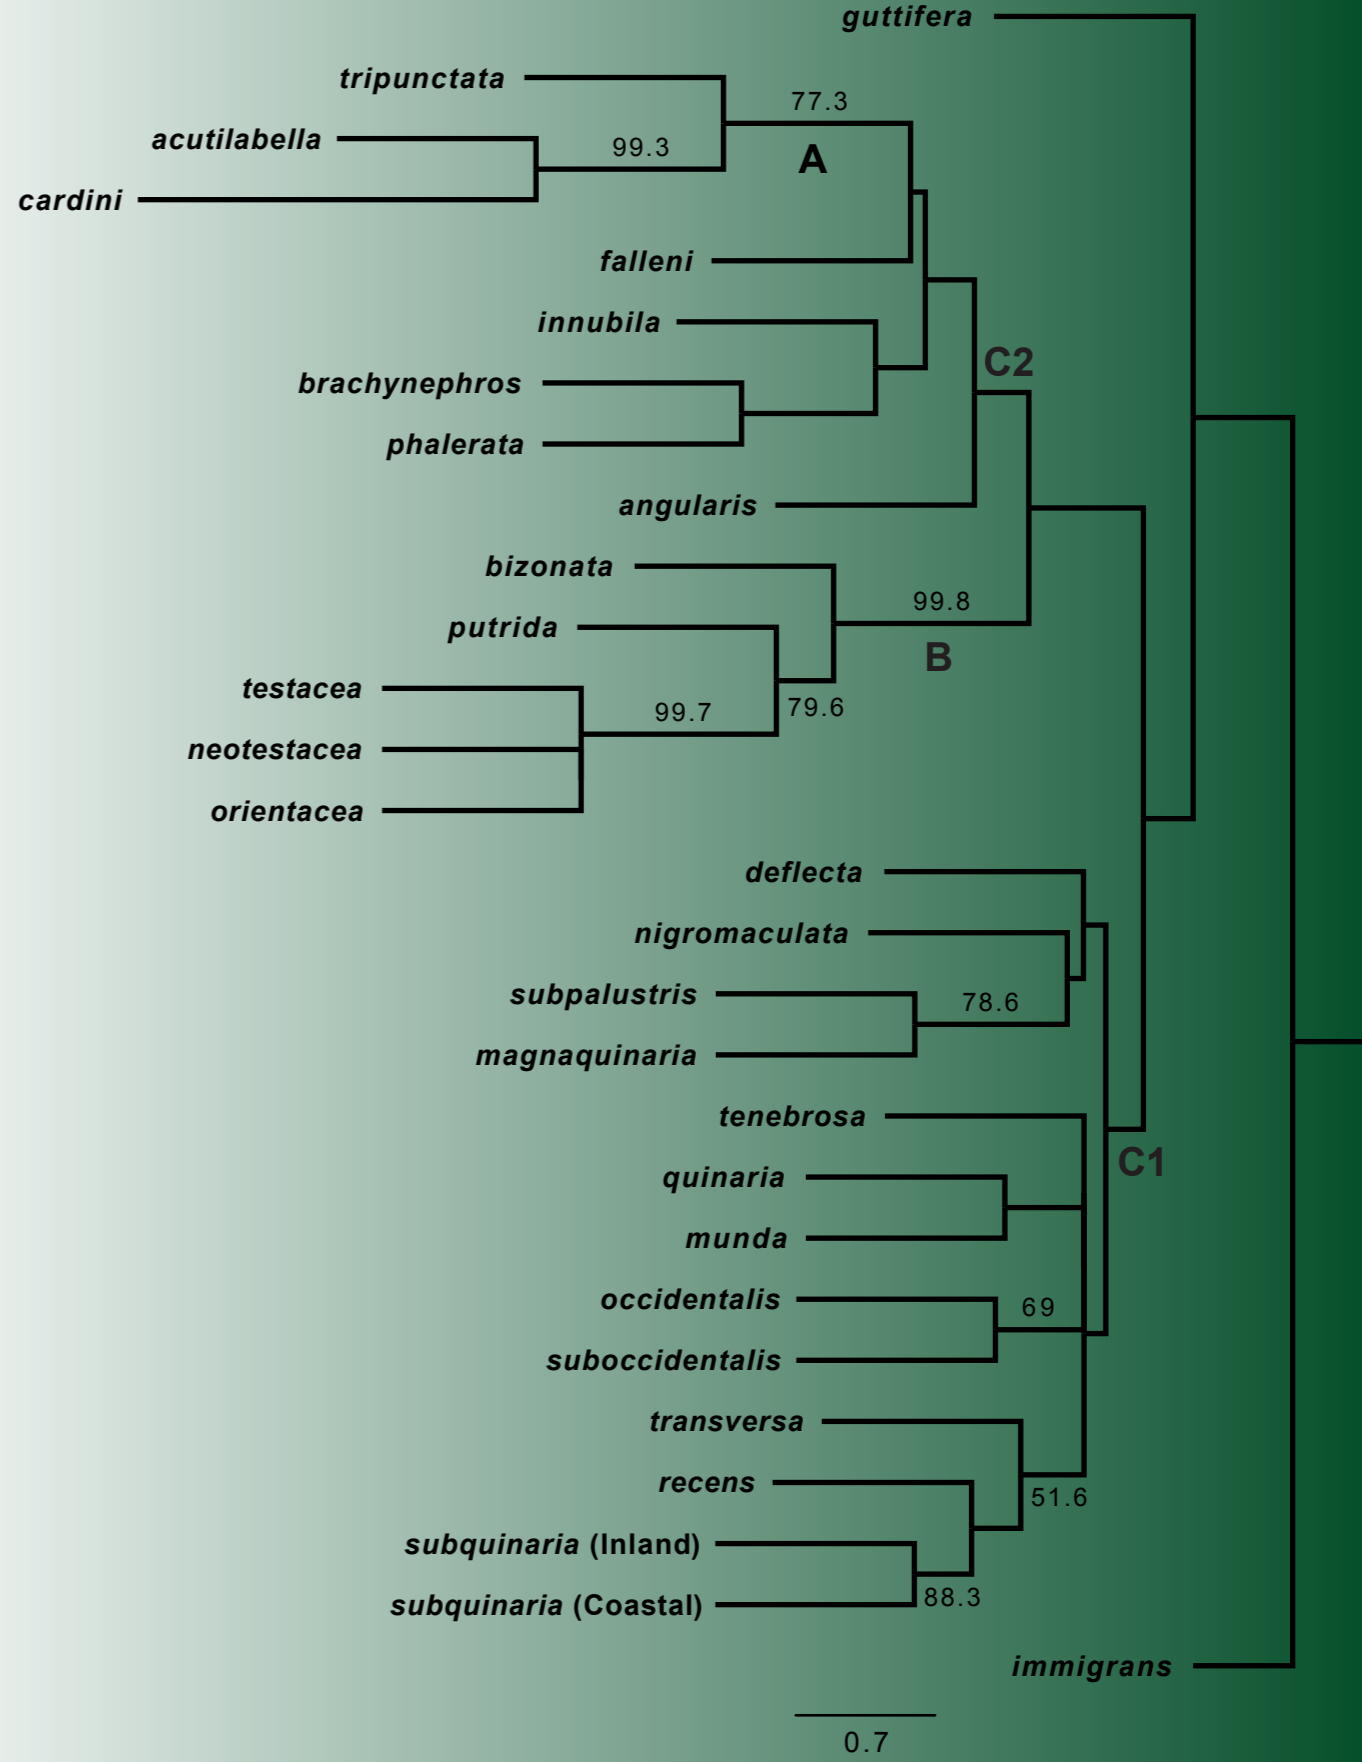

**E**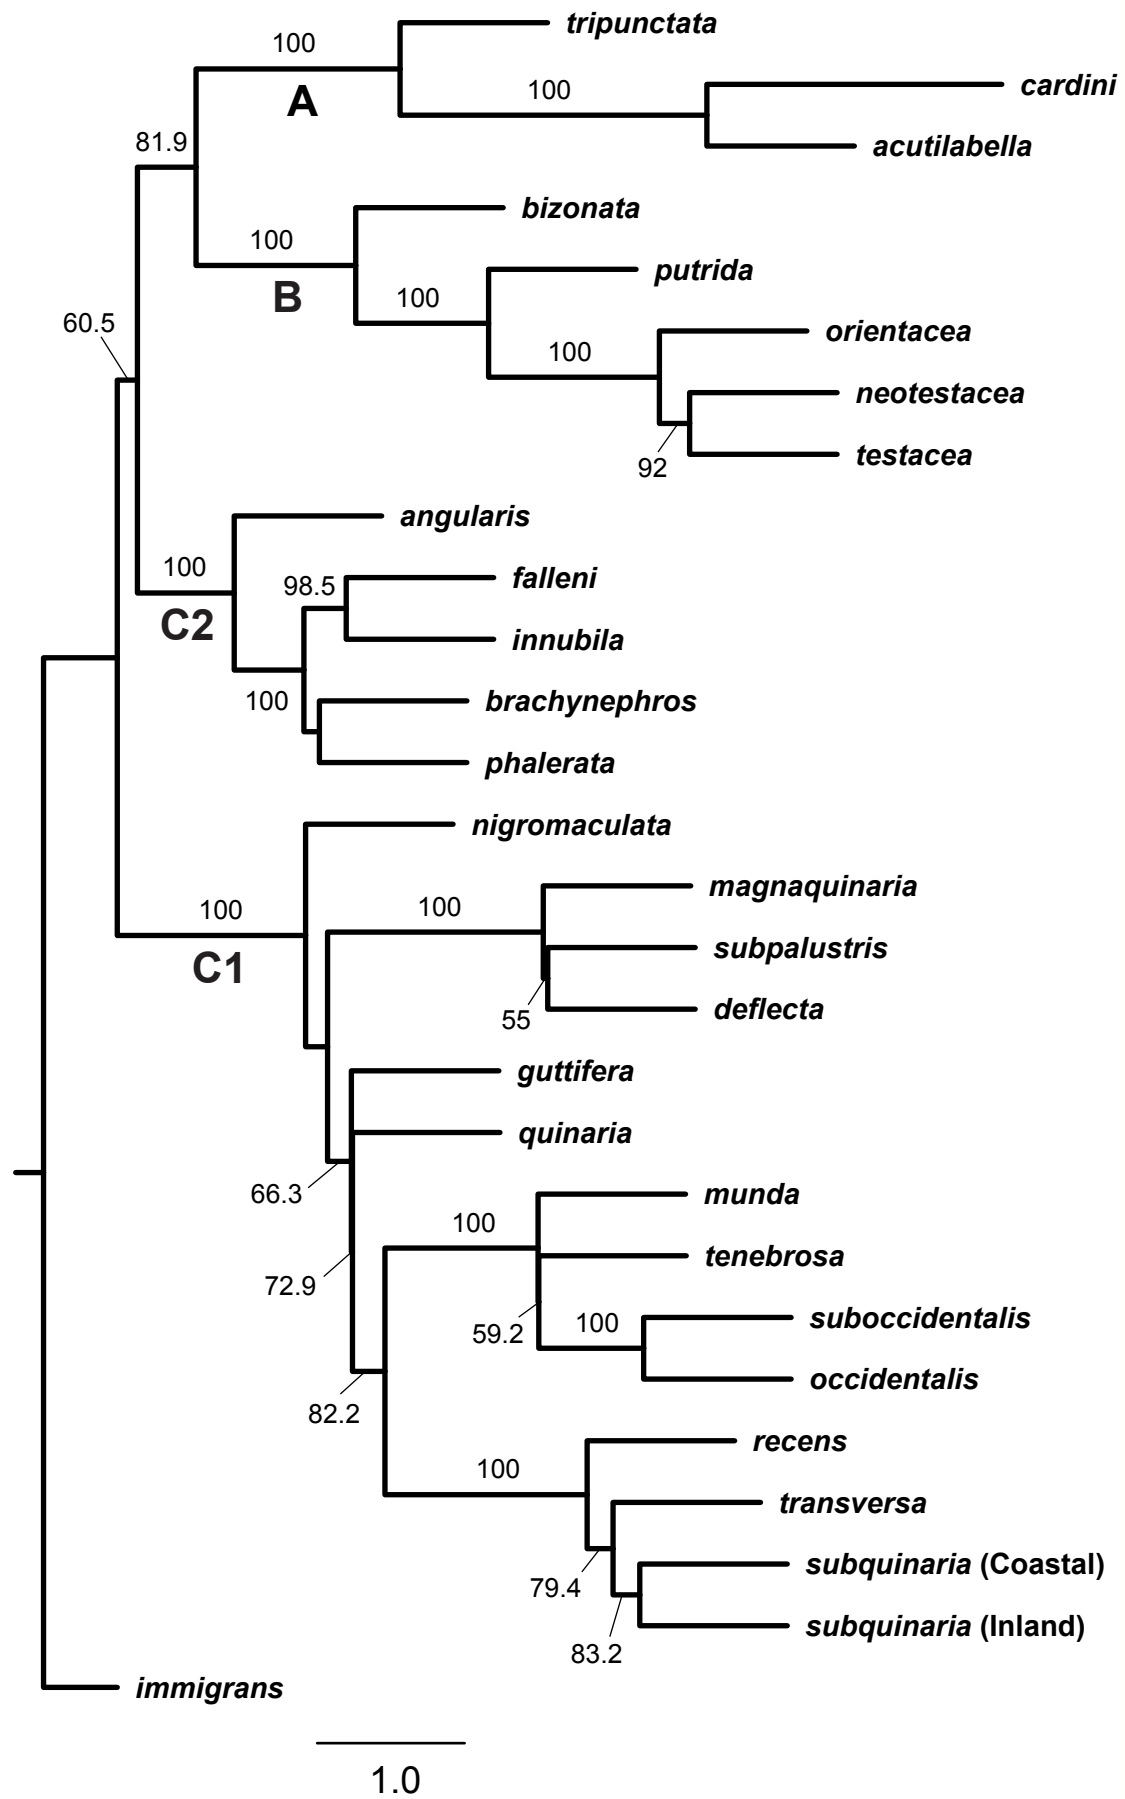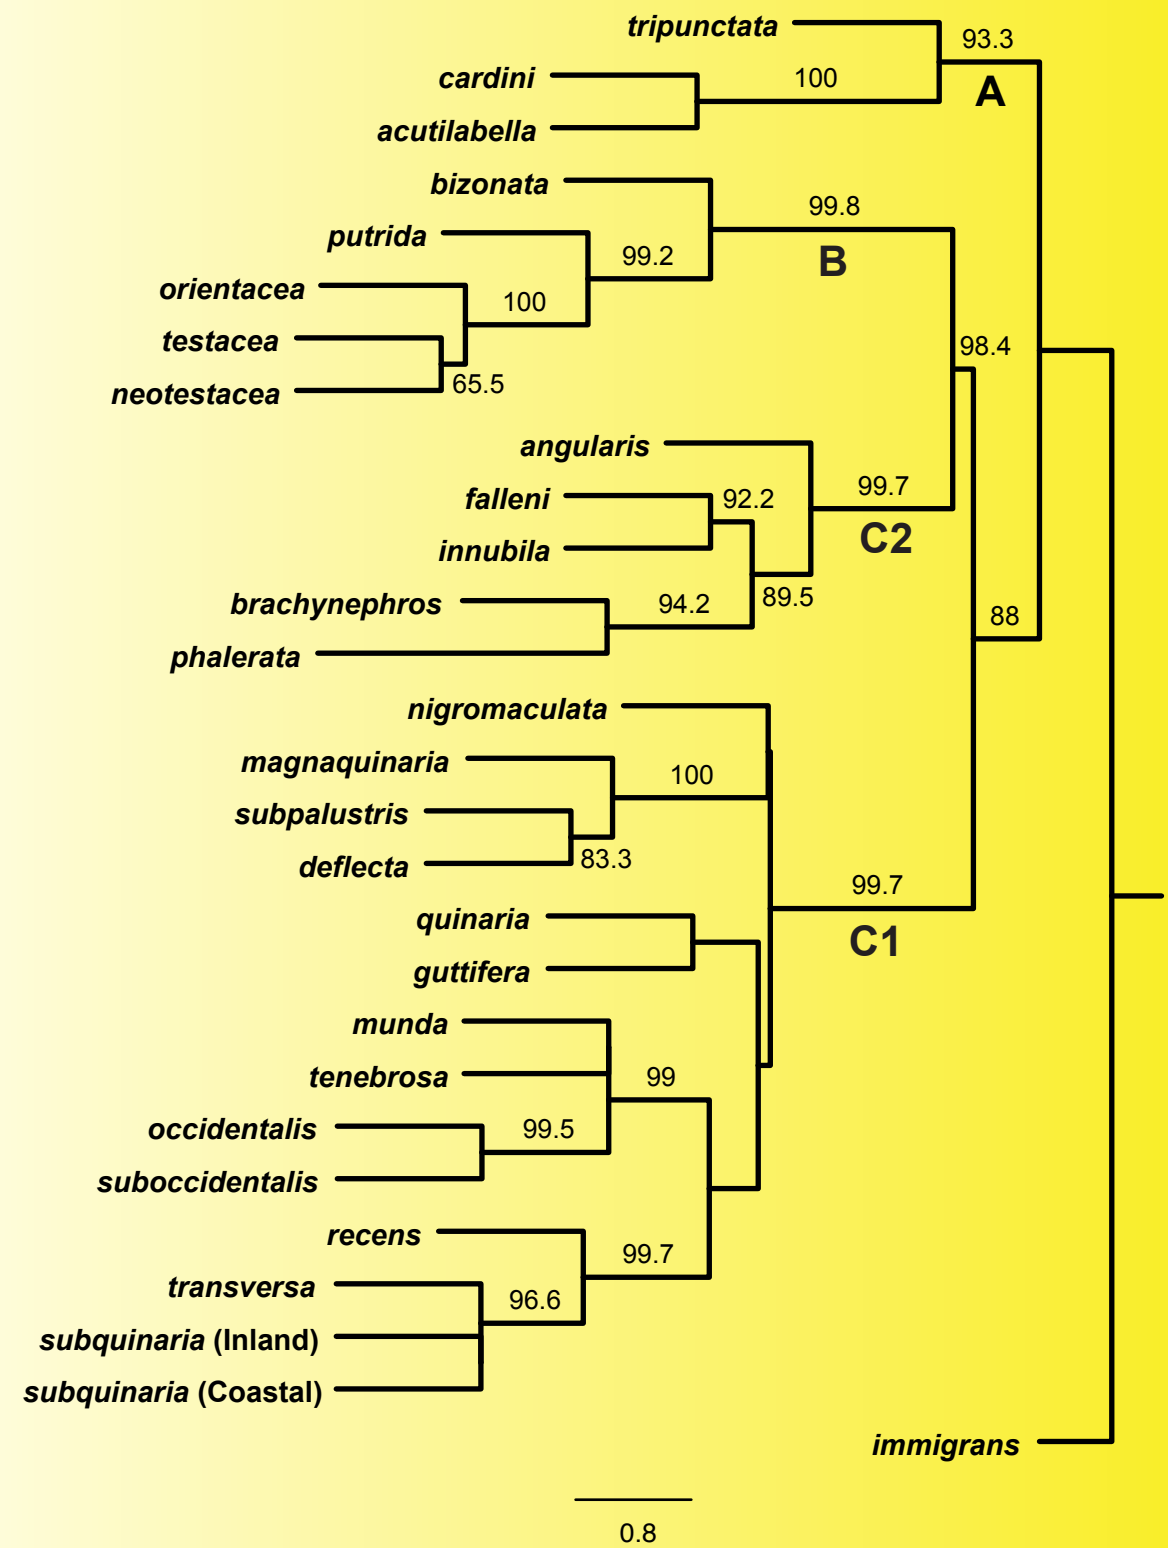

**F**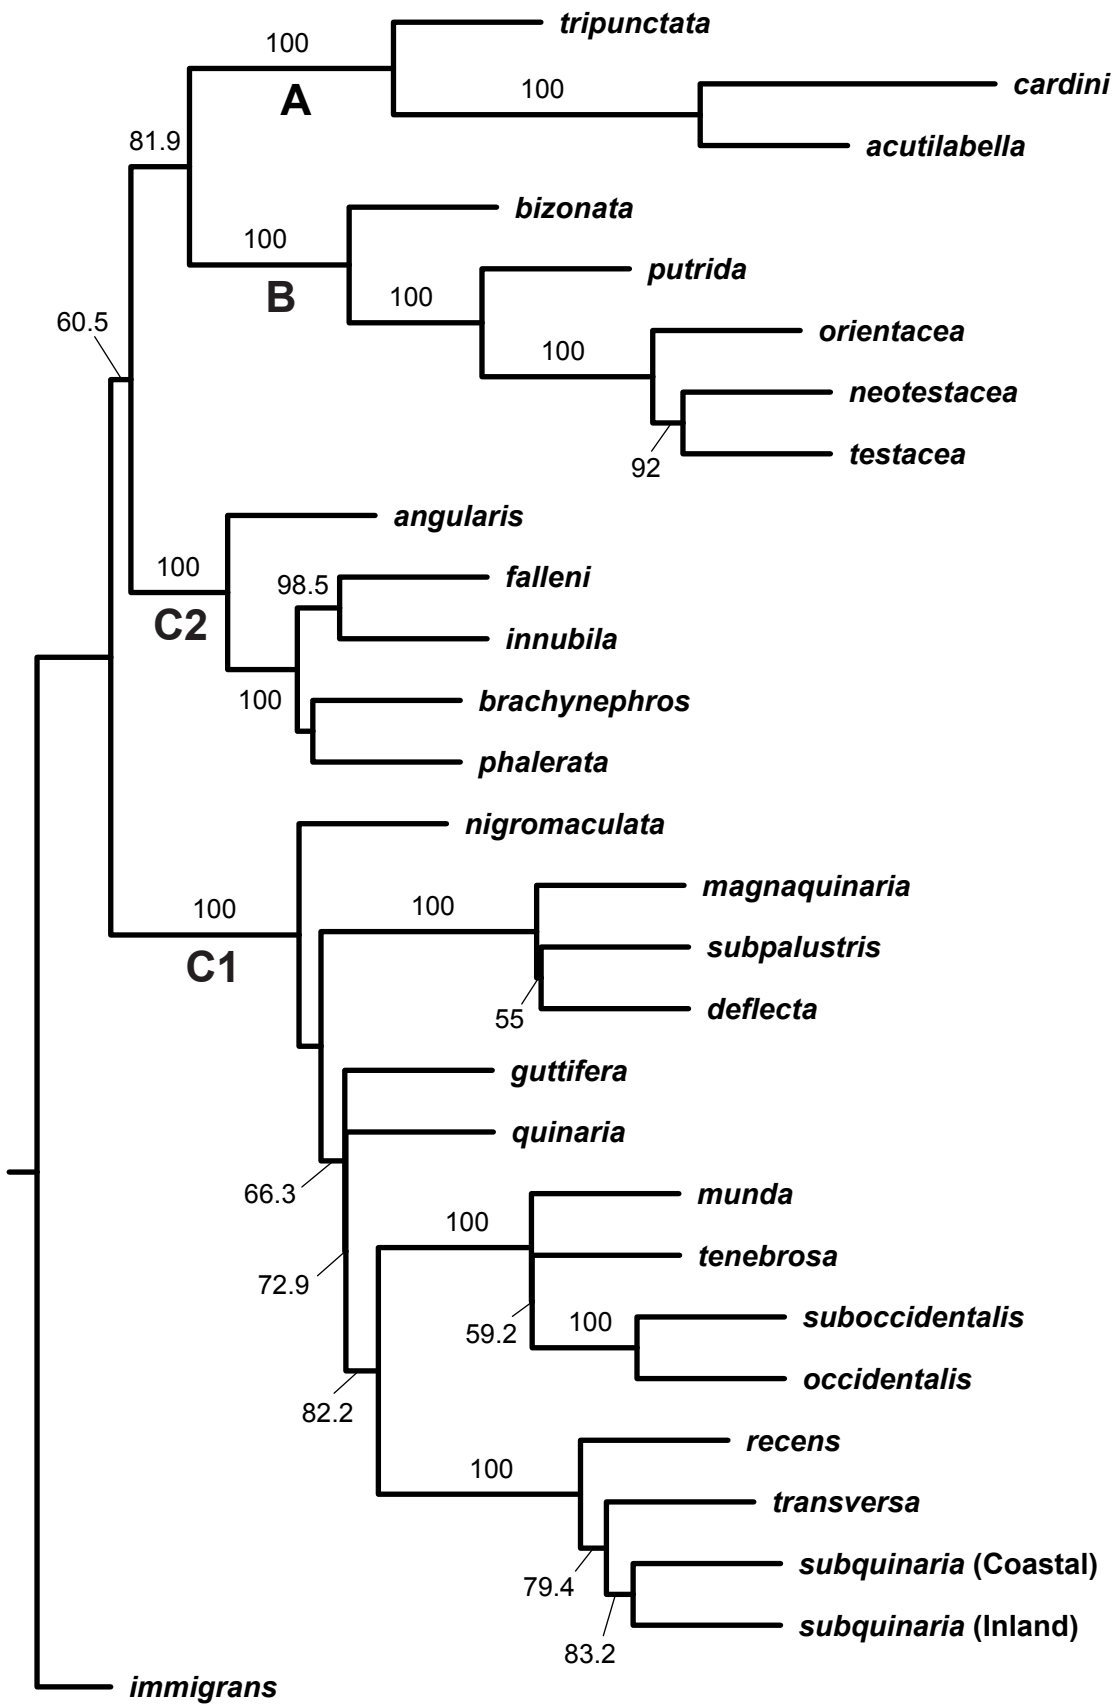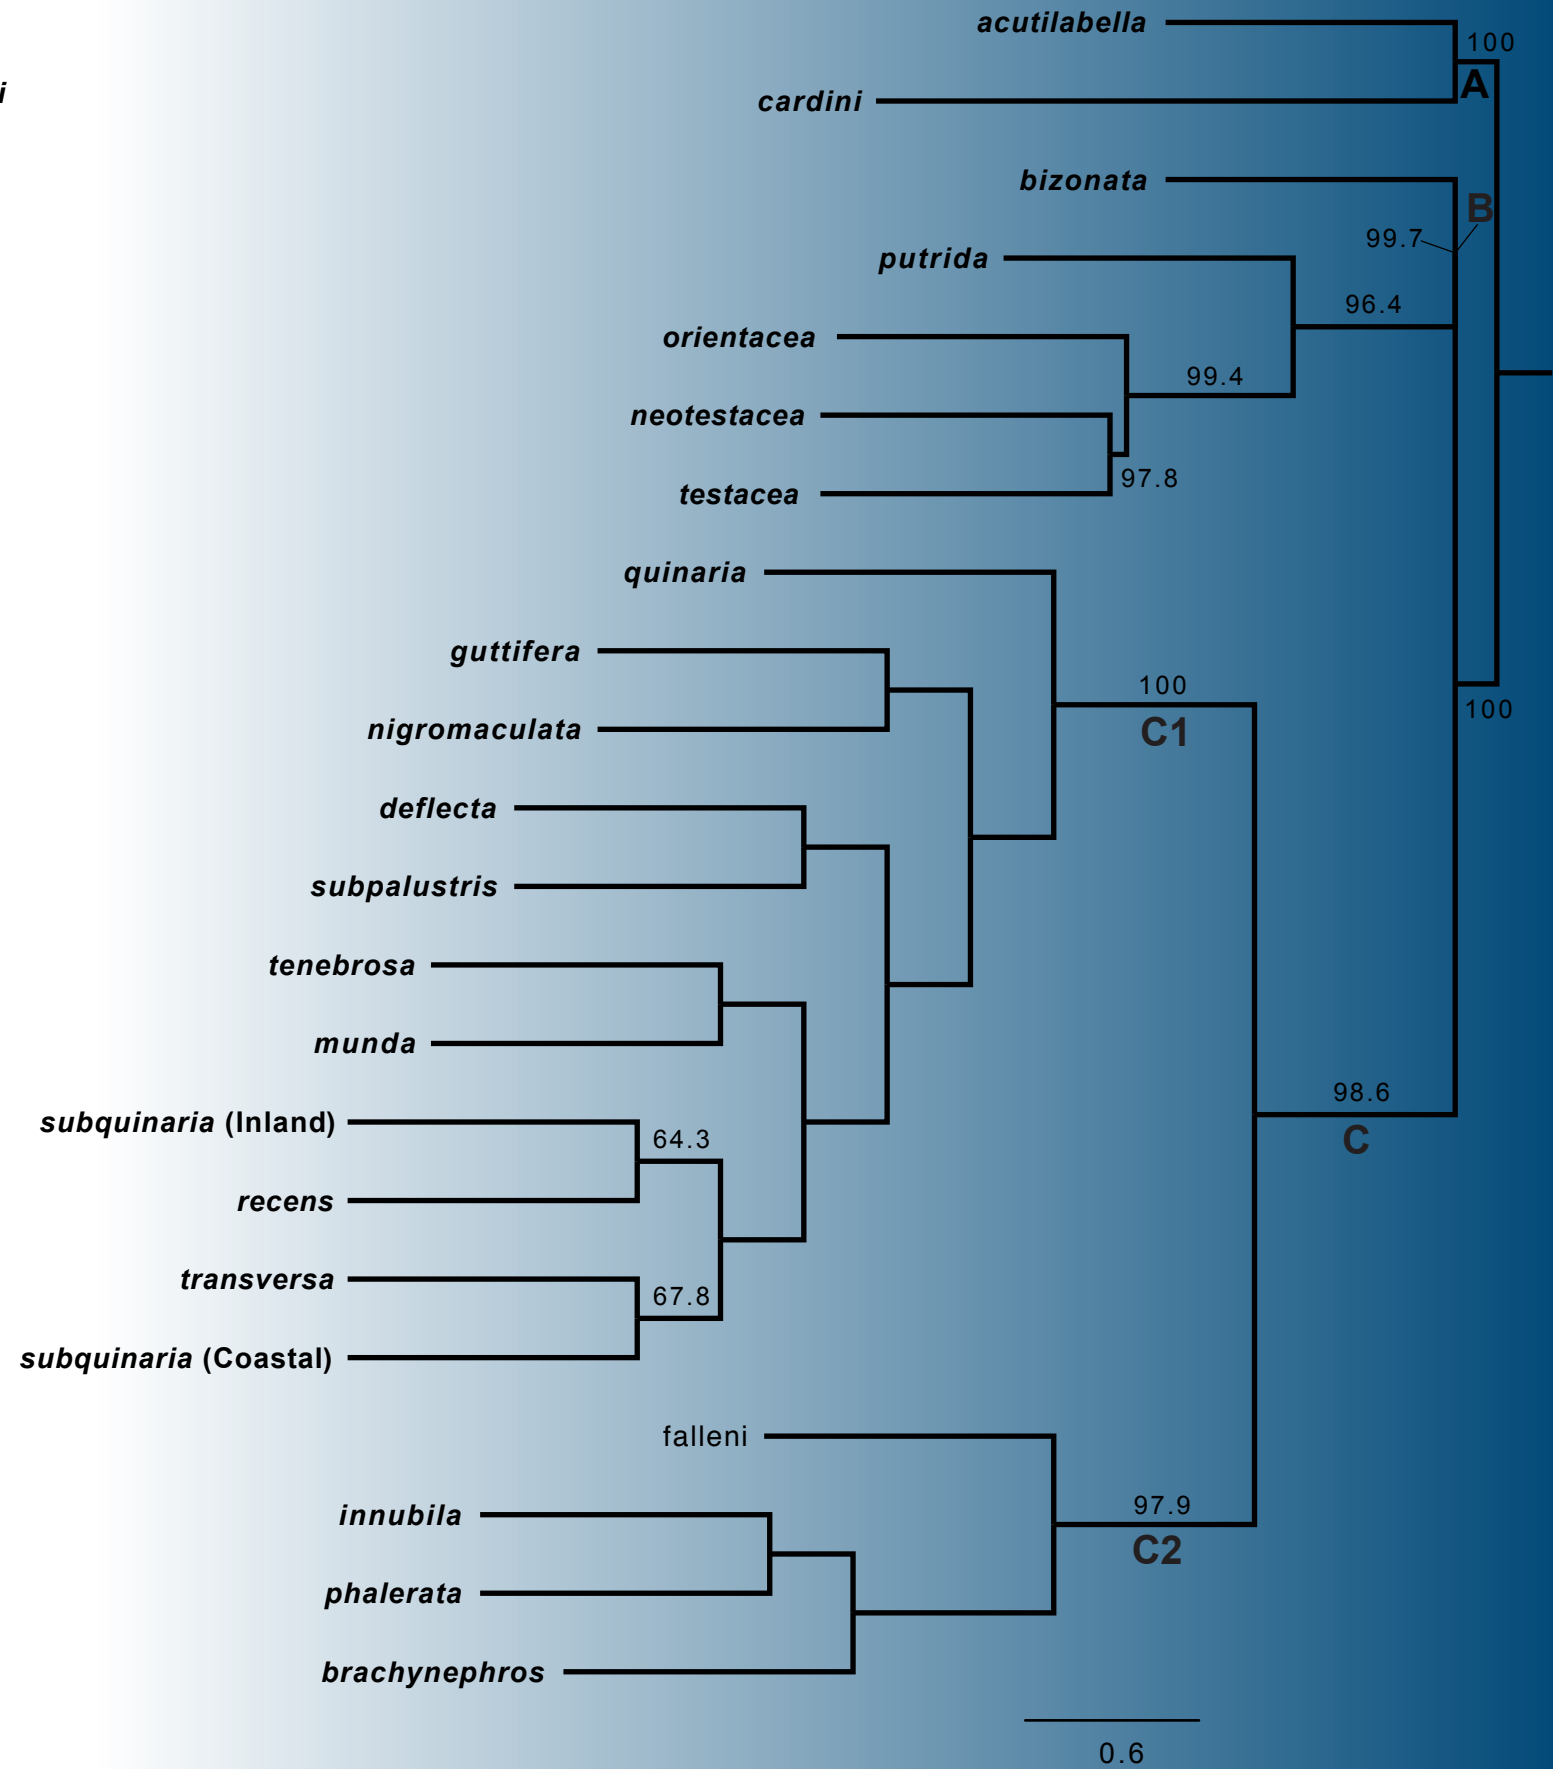

**G**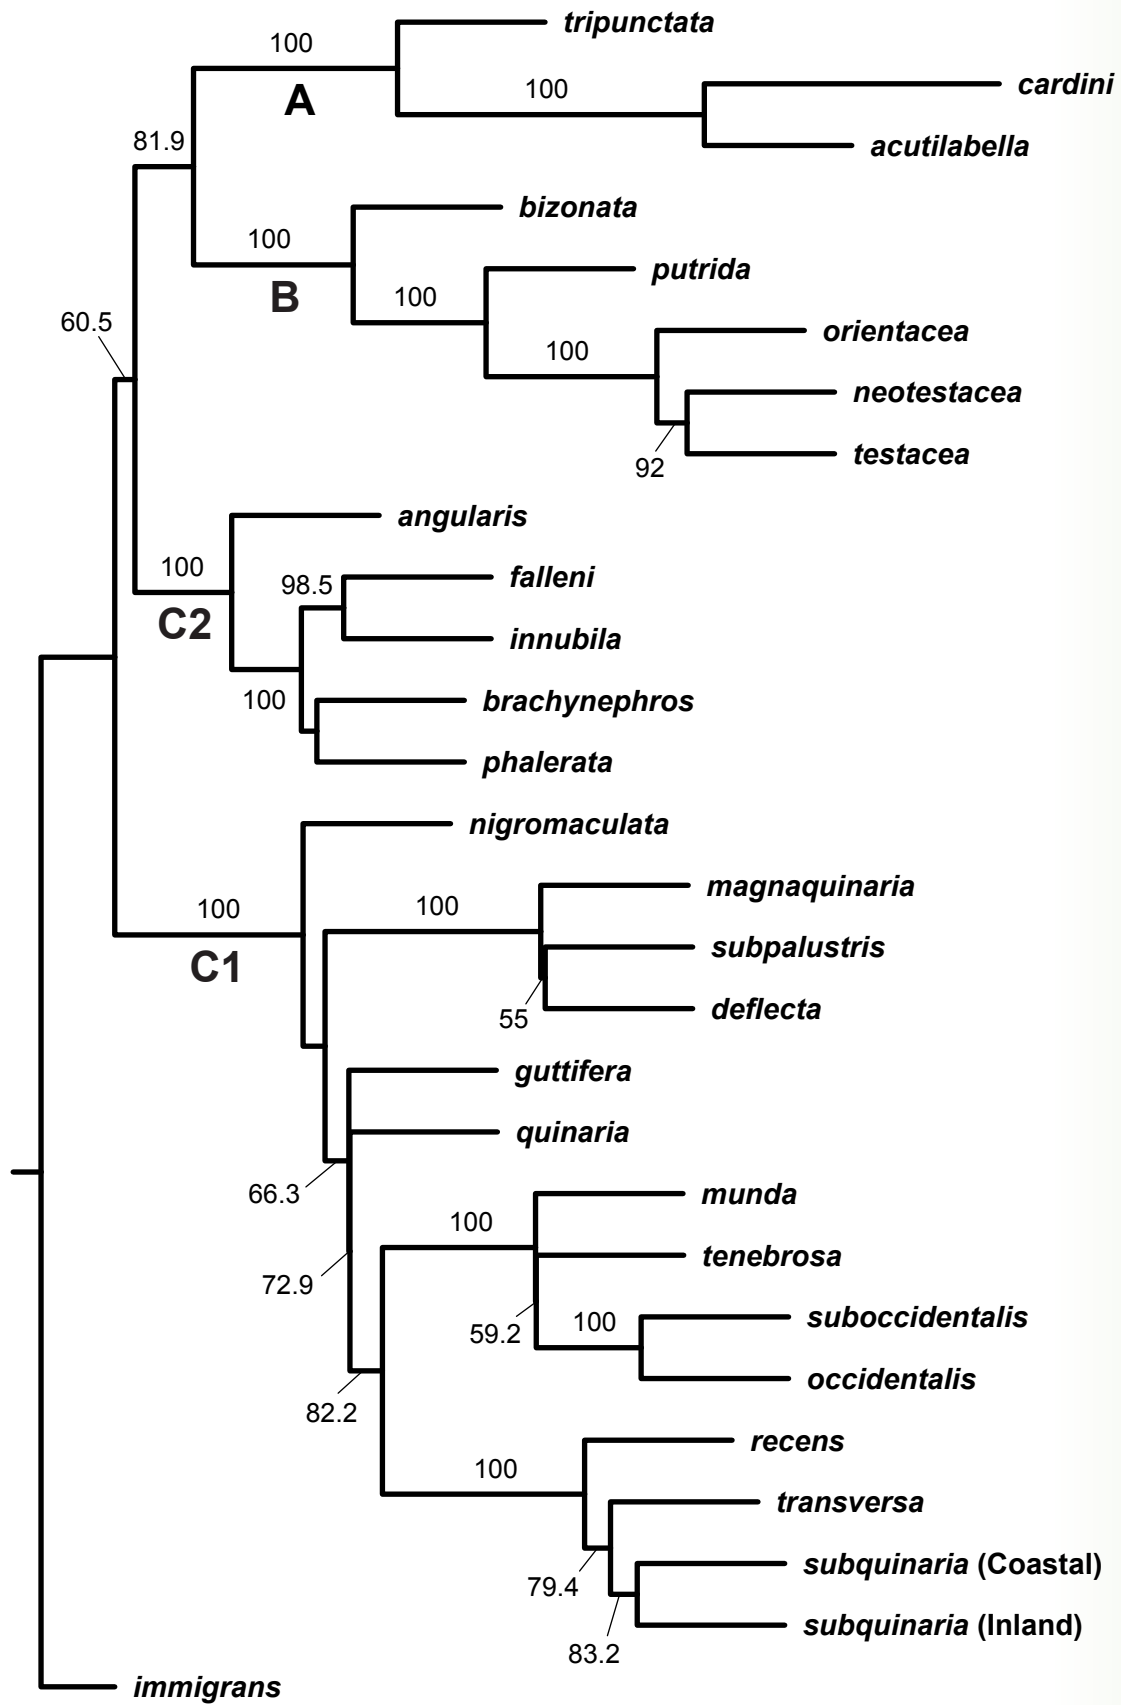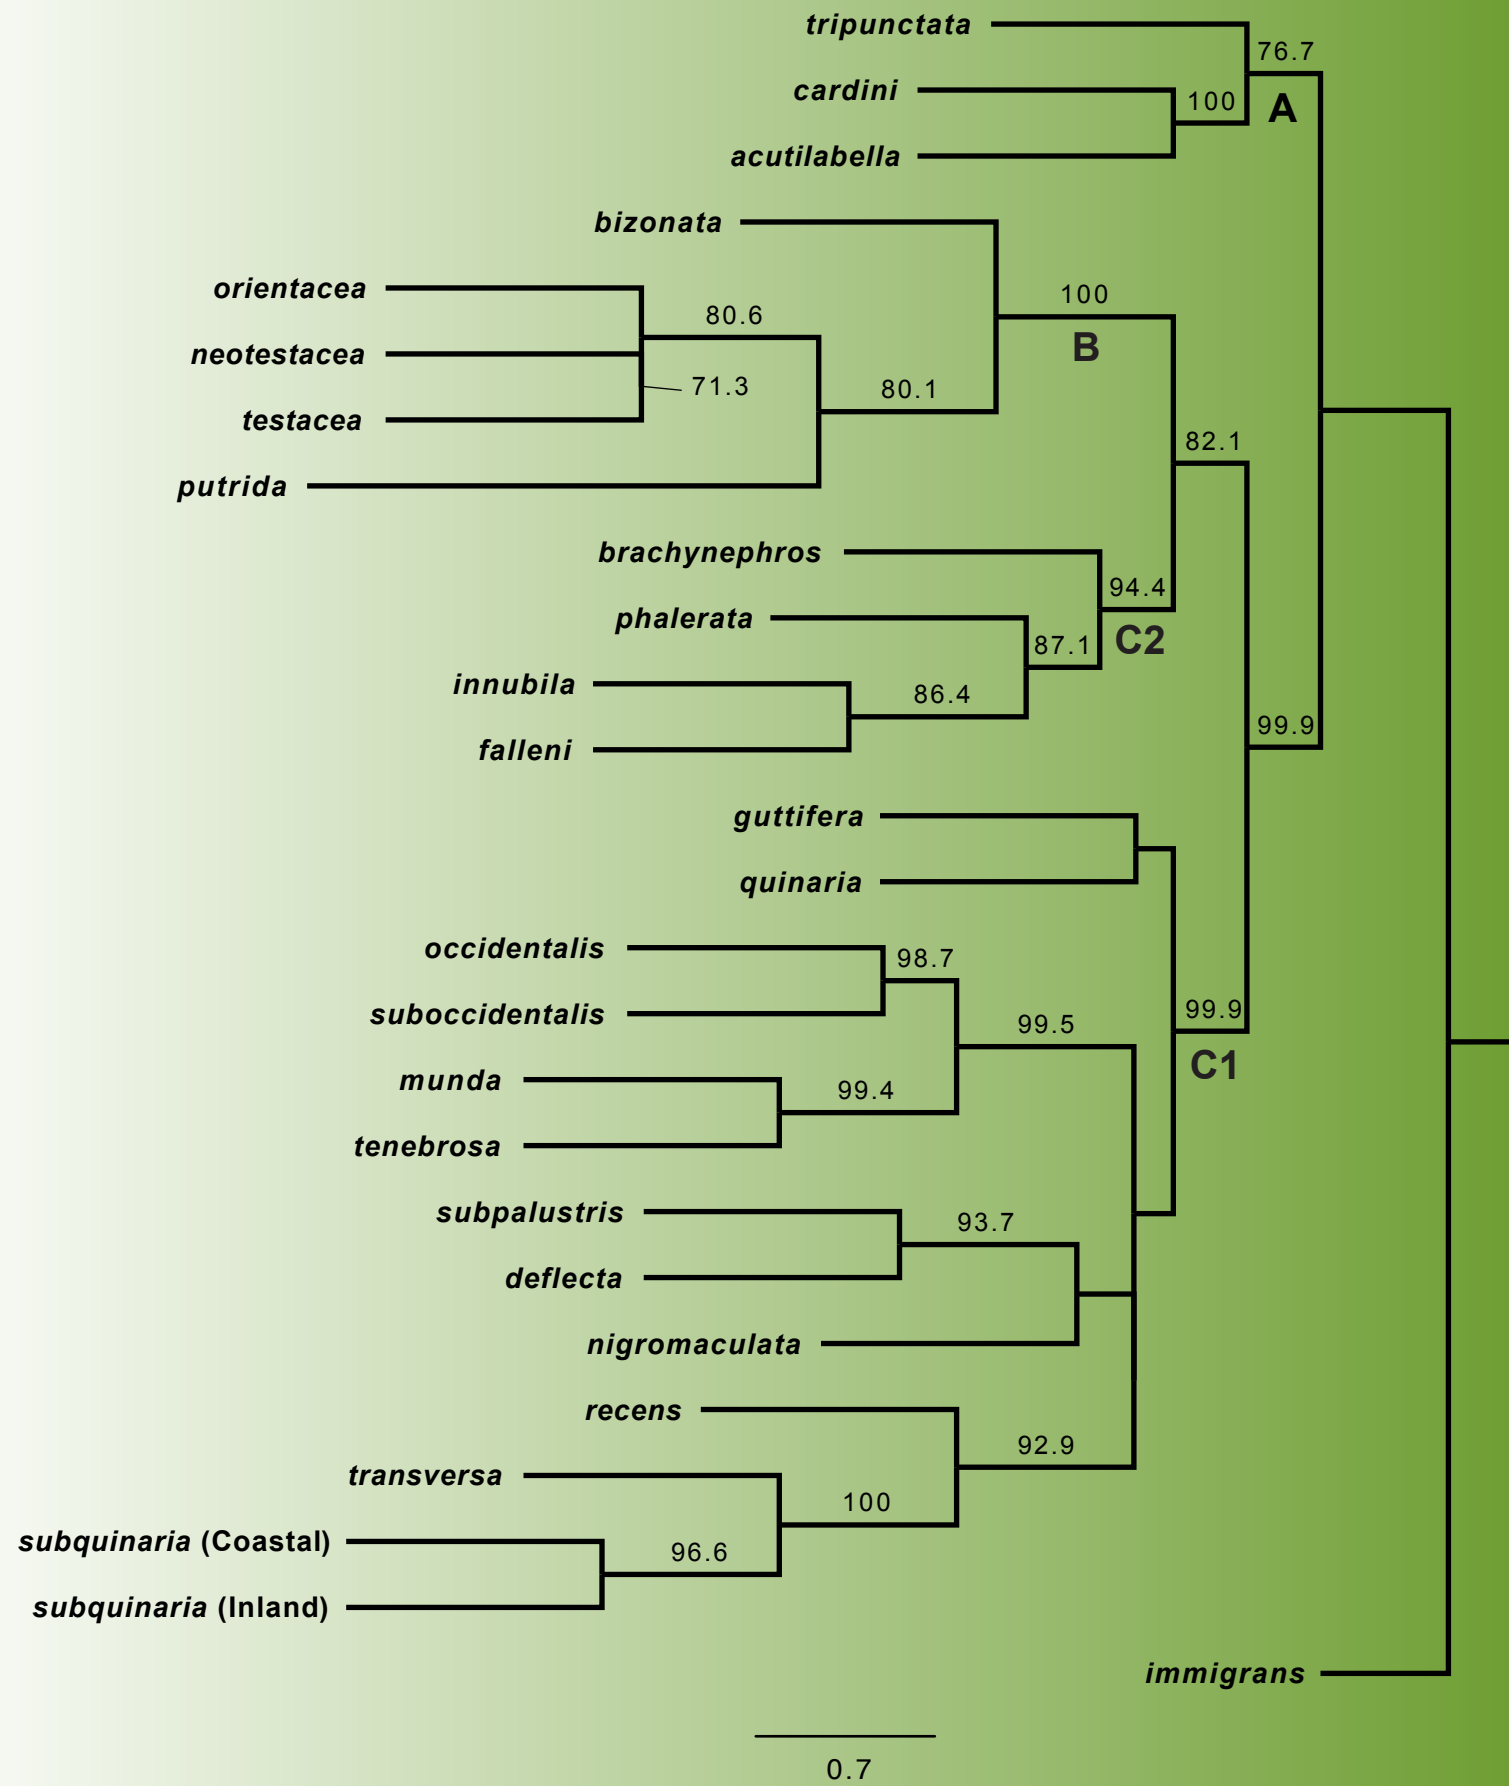

Supplement: NIHMS1511584-supplement-Supp_fig_3.pdf [file NIHMS1511584-supplement-Supp_fig_3.pdf]

$w = d_N/d_S$

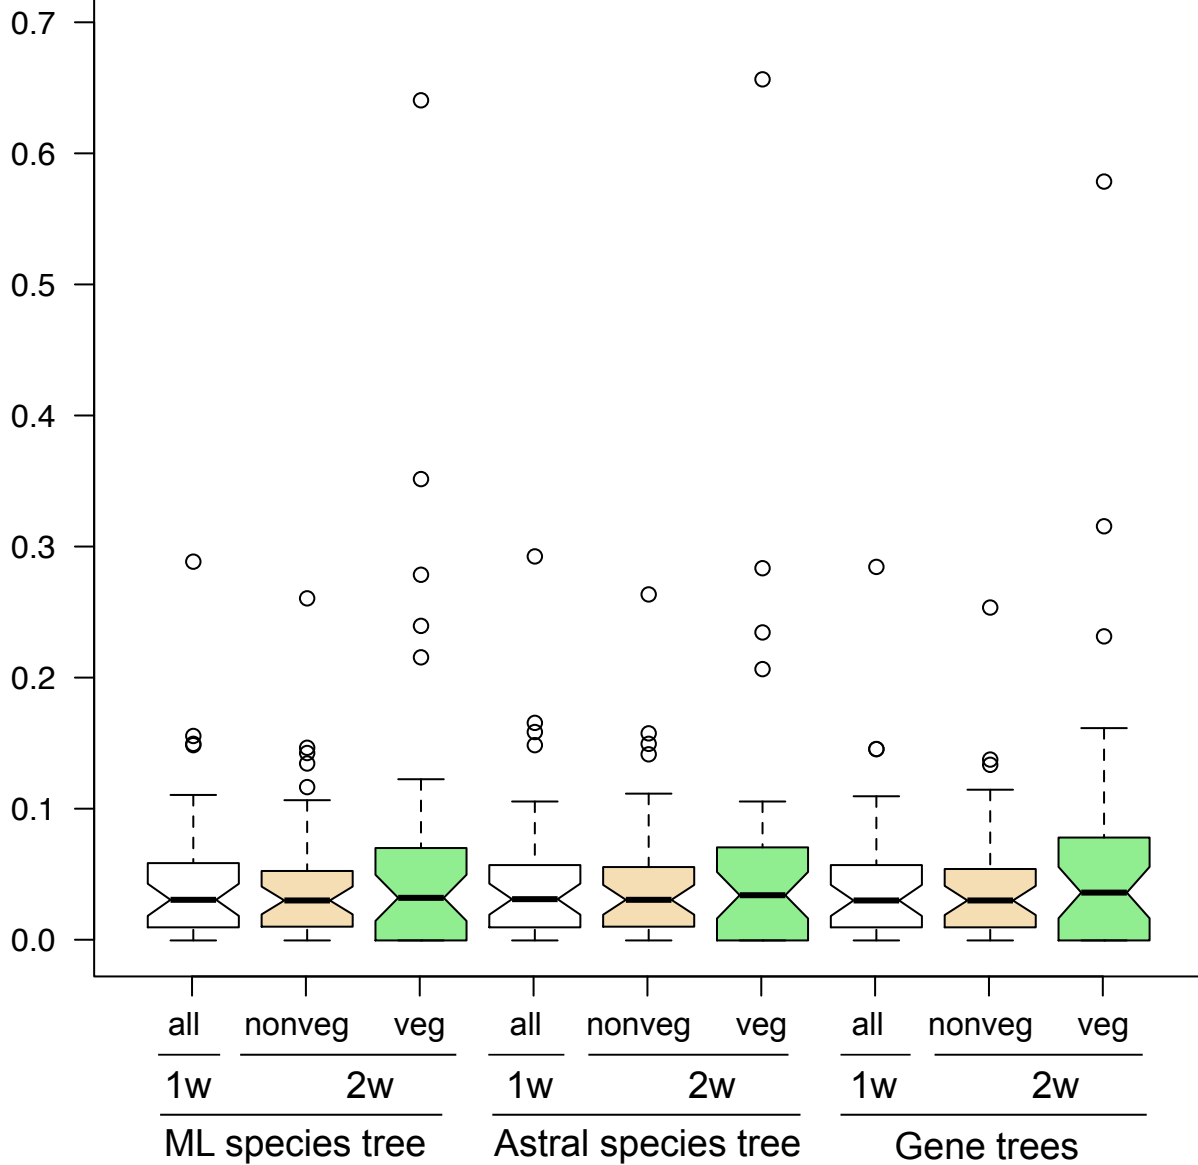

Supplement: NIHMS1511584-supplement-Supp_fig_4.pdf [file NIHMS1511584-supplement-Supp_fig_4.pdf]
